# Supplementary material for: Undiagnosed and Uncontrolled Hypertension at a Federally Qualified Health Center
Source: Research Square preprint supplement (doi:10.21203/rs.3.rs-7246331/v1), 2025-08-06
Supplement: Supplementary file 1 [file 36ca5f49ac6575797e9c65b6.xlsx]

## Sheet: Table 1
Table 1. Patient characteristics by year.
	2019	2020	2021	2022	2023
	N=28,561	N=31,005	N=40,260	N=31,001	N=31,102
Age	46.3 (16.5)	46.4 (16.8)	47.4 (17.0)	46.9 (16.7)	47.0 (16.8)
Male	9,764 (34%)	10,922 (35%)	15,386 (38%)	10,855 (35%)	10,833 (35%)
Race
Asian	665 (2%)	650 (2%)	1,015 (3%)	693 (2%)	727 (2%)
Black	6,545 (23%)	7,526 (24%)	9,384 (23%)	6,862 (22%)	6,597 (21%)
White	18,854 (66%)	19,497 (63%)	24,627 (61%)	19,603 (63%)	19,502 (63%)
Other/Unreported	2,497 (9%)	3,332 (11%)	5,231 (13%)	3,843 (12%)	4,275 (14%)
Hispanic	13,643 (48%)	13,925 (45%)	16,387 (41%)	15,206 (49%)	15,900 (51%)
Preferred Language
English	14,172 (50%)	14,335 (46%)	12,577 (31%)	10,981 (35%)	10,052 (32%)
Spanish	10,236 (36%)	10,392 (34%)	9,944 (25%)	9,194 (30%)	9,199 (30%)
Other	4,153 (15%)	6,278 (20%)	17,739 (44%)	10,826 (35%)	11,851 (38%)
Visit Count	5.1 (8.9)	4.7 (6.7)	4.8 (6.7)	5.2 (8.8)	5.2 (7.9)
Patients with 1 Visit	7,632 (27%)	8,744 (28%)	9,169 (23%)	8,383 (27%)	7,922 (25%)
Payor
Private	6,204 (22%)	7,061 (23%)	10,653 (26%)	6,531 (21%)	6,379 (21%)
Medicaid	3,184 (11%)	3,031 (10%)	2,388 (6%)	987 (3%)	727 (2%)
Medicare	2,145 (8%)	2,134 (7%)	2,168 (5%)	1,327 (4%)	1,110 (4%)
Medicare HMO	2,016 (7%)	2,377 (8%)	2,873 (7%)	2,578 (8%)	2,727 (9%)
Contract	198 (1%)	630 (2%)	3,031 (8%)	209 (1%)	166 (0%)
Self-Pay	14,200 (50%)	14,601 (47%)	15,617 (39%)	13,284 (43%)	12,262 (39%)
Other/Unreported	614 (2%)	1,171 (4%)	3,530 (9%)	6,085 (20%)	7,731 (25%)
History of HTN	11,603 (41%)	11,261 (36%)	11,830 (29%)	11,303 (36%)	11,105 (36%)
History of DM	7,757 (27%)	7,594 (24%)	7,982 (20%)	7,868 (25%)	7,950 (26%)
History of CAD	1,286 (5%)	1,243 (4%)	1,217 (3%)	1,105 (4%)	1,023 (3%)
Smoking
Current	2,745 (10%)	2,587 (8%)	2,121 (5%)	2,075 (7%)	1,943 (6%)
Former	1,922 (7%)	1,680 (5%)	1,503 (4%)	1,529 (5%)	1,589 (5%)
Never	8,953 (31%)	8,690 (28%)	7,740 (19%)	8,063 (26%)	7,589 (24%)
Not reported	14,941 (52%)	17,473 (56%)	27,678 (69%)	17,802 (57%)	17,911 (58%)
SBP (mmHg)	126.6 (17.5)	128.4 (18.4)	128.6 (18.3)	128.1 (17.9)	126.9 (17.5)
DBP (mmHg)	76.0 (8.7)	76.7 (9.0)	77.3 (8.9)	77.2 (8.8)	76.4 (8.7)
BMI (kg/m2)	31.1 (7.4)	31.4 (7.6)	31.4 (7.5)	31.3 (7.4)	31.3 (7.3)
A1c (%)	6.9 (1.8)	6.9 (1.9)	6.9 (1.9)	6.9 (1.8)	6.7 (1.7)
Continuous variables reported as averages with N (SD) and categorical variables reported as counts with N (%). Abbreviations: HMO: Health Maintenance Organization; HTN: hypertension; DM: diabetes mellitus; CAD: coronary artery disease; SBP: systolic blood pressure; DBP: diastolic blood pressure; BMI: body mass index; A1c: hemoglobin A1c.
