# Supplementary material for: Undiagnosed and Uncontrolled Hypertension at a Federally Qualified Health Center
Source: Research Square preprint supplement (doi:10.21203/rs.3.rs-7246331/v1), 2025-08-06
Supplement: Supplementary file 2 [file 9b47f7265b0918ca73e20781.xlsx]

## Sheet: Table 2
Table 2a. Rates of undiagnosed hypertension by year.
	2019	2020	2021	2022	2023
	N=11,341	N=9,686	N=12,211	N=12,161	N=12,757
Undiagnosed HTN	2,766 (24%)	2,933 (30%)	3,824 (31%)	3,707 (30%)	3,653 (29%)
Undiagnosed Stage 2 HTN	602 (5%)	715 (7%)	920 (8%)	827 (7%)	789 (6%)
Table 2b. Rates of uncontrolled hypertension by year.
	2019	2020	2021	2022	2023
	N=11,529	N=9,931	N=11,066	N=10,942	N=10,834
Uncontrolled HTN	8,558 (74.2%)	7,754 (78.1%)	8,713 (78.7%)	8,517 (77.8%)	8,076 (74.5%)
Stage 2 HTN	4,940 (42.8%)	4,712 (47.4%)	5,510 (49.8%)	5,305 (48.5%)	4,924 (45.4%)
Reported as N (%). 2a: N for the year based on patients eligible to be classified as undiagnosed hypertension which includes patients without a history of hypertension, with at least 2 visits during that year, and recorded blood pressure readings. 2b: N for the year based on all patients with a history of hypertension and a recorded blood pressure reading during that year. Abbreviations: HTN: hyp…
